# Supplementary material
Source: MDPI journal article supplement (https://www.mdpi.com/2073-4336/11/4/58)
Supplement: s1 [file s1]

## Generosity game

# Welcome

- Please turn off your mobile phone right now.
- Please be silent during the experiment.
- Thank you

## Welcome

- First, you must sign a consent form and read the information sheet.
- Please sit down at one of the designated computers.
- Fill out the information sheet provided.
- Wait for the study to begin.

## Generosity game

- At the beginning of the game, you have £4.00.
- During the game, you might gain money.
- You can also lose money.
- The money you have the end of the game is yours to take home.
- There is a small possibility that you might go home with no money.

## Generosity game

- There are 12 rounds.
- There are two roles:
  - DONOR (the one who gives money to someone else)
  - RECEIVER (the one who receives money)
- In every round, you are EITHER the donor or the receiver.
- This is decided randomly by the computer.

There are ten players.

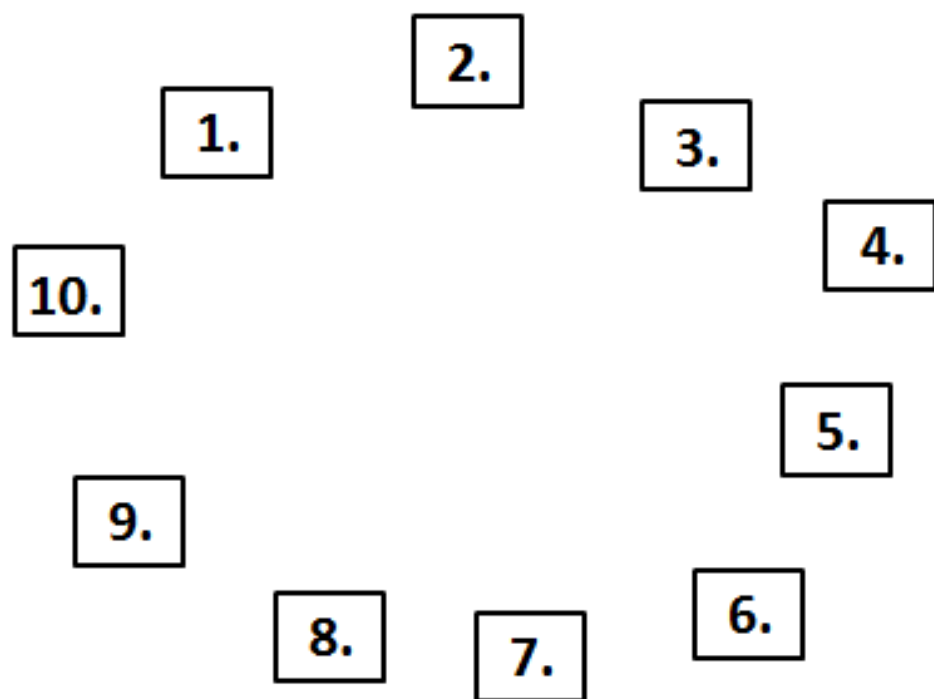

You are randomly paired with someone else in each round (the computer decides).

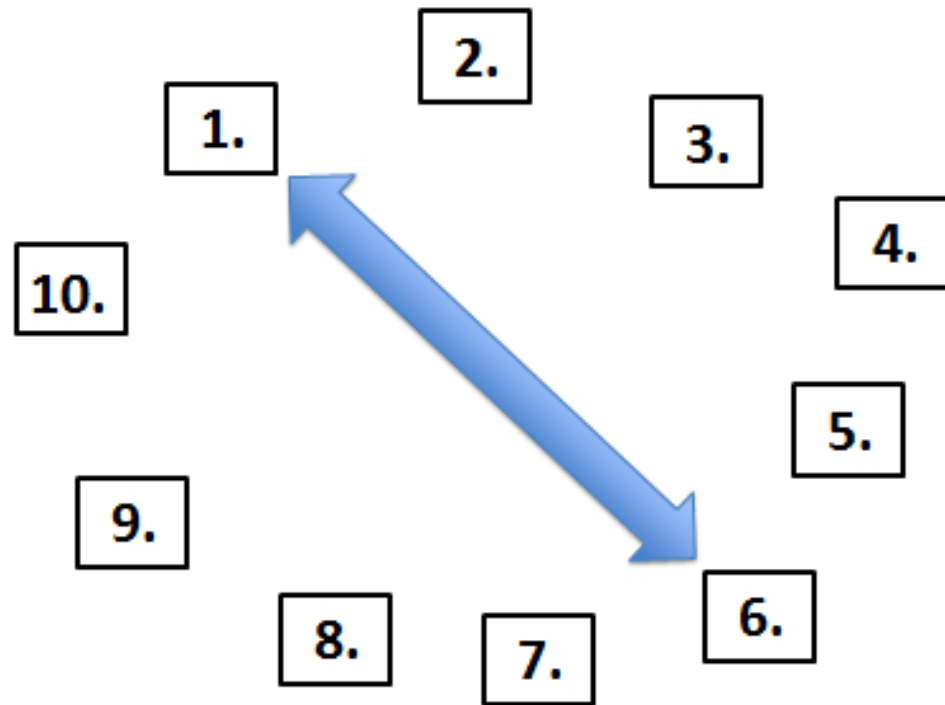

It is different every time.

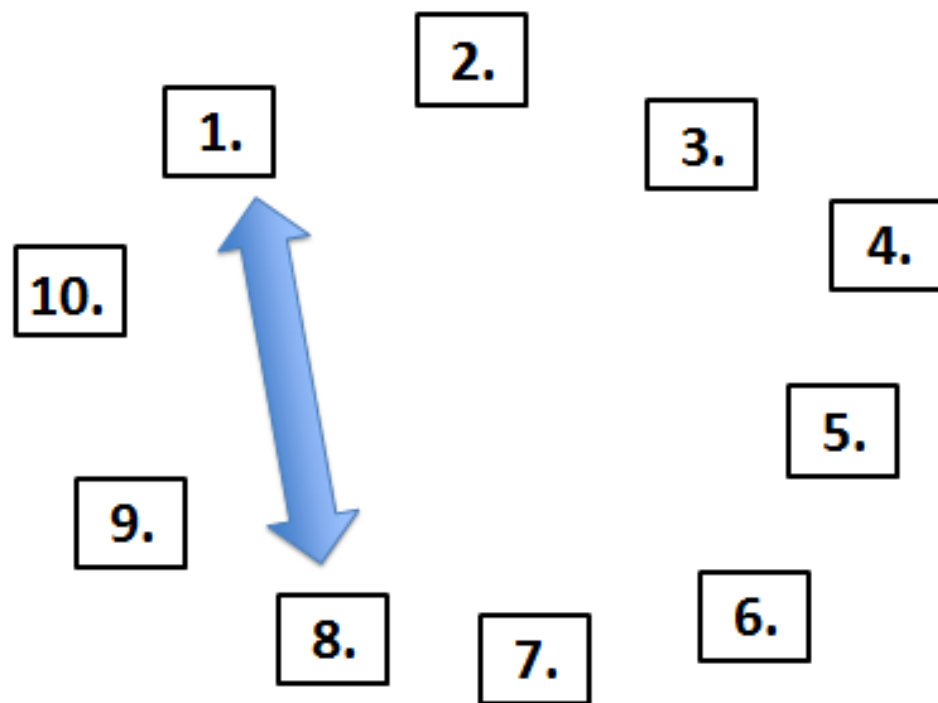



You never know who the other person  
is. The identity is secret.

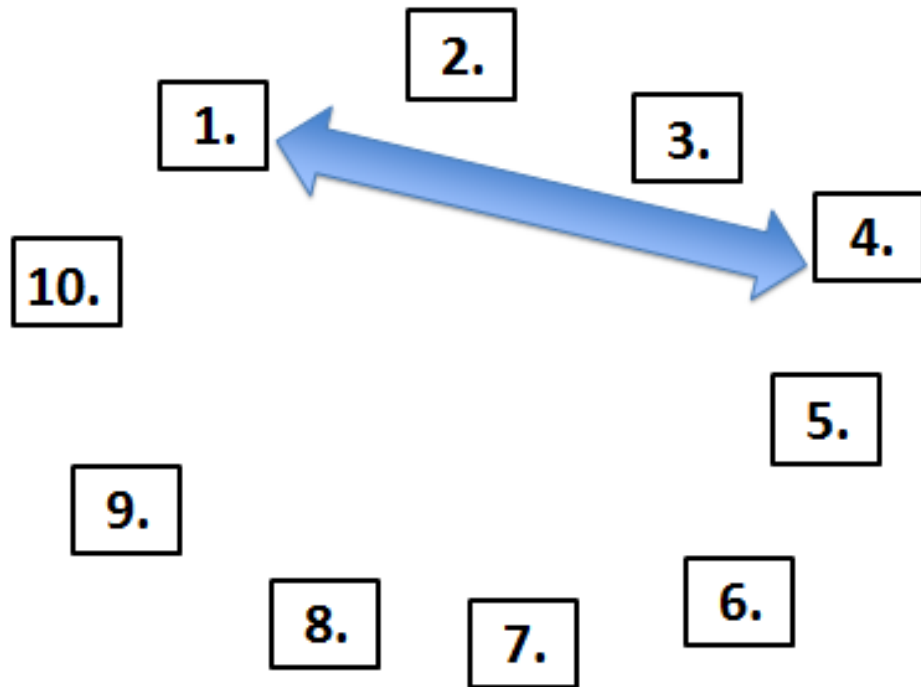

In each round, the computer designates you as  
either DONOR or RECEIVER

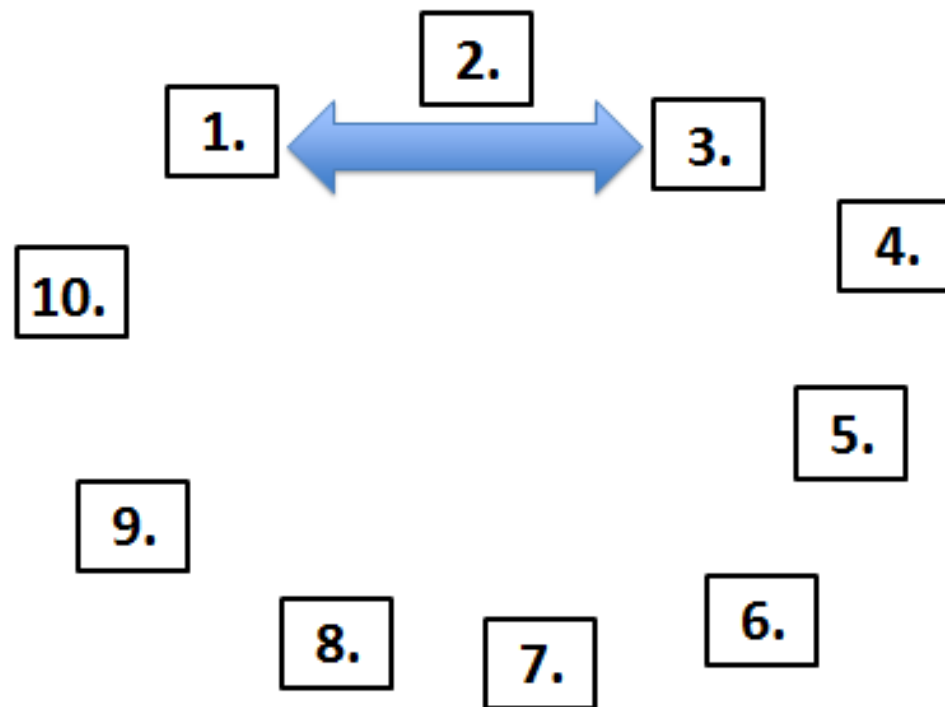

The DONOR gives money to the RECEIVER

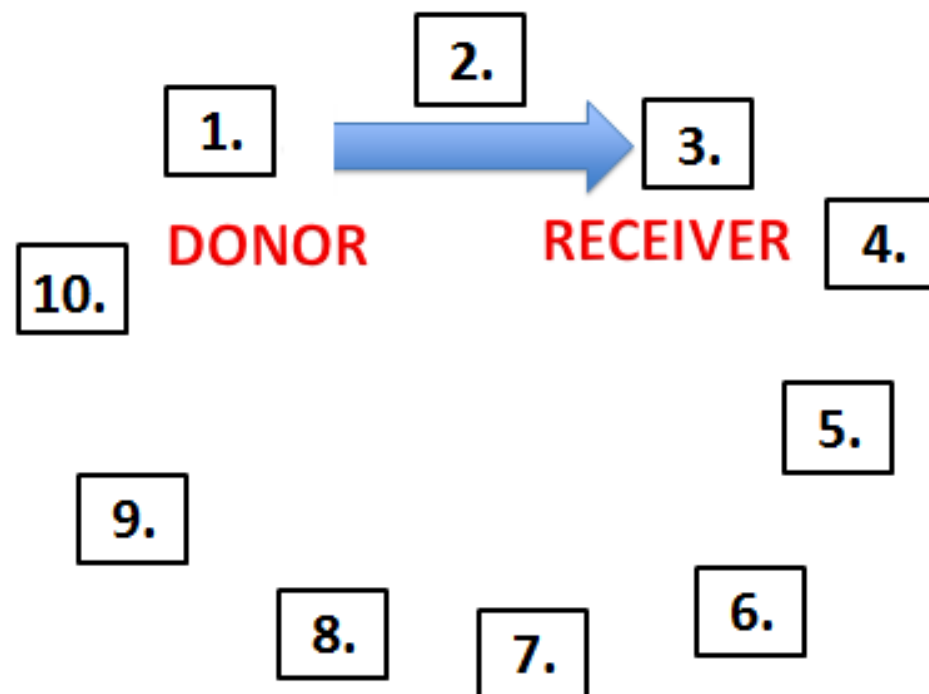

## Receiver role

- If you are the RECEIVER, the computer tells you that you are the receiver.
- All you need to do is click “OK” and wait.



## Donor role

- If you are the DONOR, the computer gives you a choice.
- Do you want to give money to the other person?
  - If YES, then you give away £0.50.
  - If NO, then you keep your money.

## Multiplying rule

- Every donation is multiplied by four.
- Therefore, if you give £0.50, the receiver gets £2.00.

**£0.50**      x 4      =      **£2.00**

DONOR

RECEIVER

## Information on screen

- How many rounds are left.
- How much money you have.
- How many times you gave money to someone else.
- How many times you received money from someone else.
- How many times the other person gave money to someone else.



## Goal

- The aim of the game is to make as much money as possible.
- Focus on your decision:
  - Give money
  - Do not give money
- Good luck!
