# Supplementary material
Source: MDPI journal article supplement (https://www.mdpi.com/2073-4336/11/4/58)
Supplement: s1 [file s1]

Round

1 out of 12

Right now, you have £4.00.

In this round, you are the RECEIVER. You do not need to make a decision. Please wait.

continue

Round

1 out of 12

Right now, you have £ 4.00 .

In this round, you are the DONOR.

You have been randomly paired with someone else in this room. That other person is the RECEIVER in this round.

The receiver's record: In the last 0 time(s) as a DONOR, this person gave out money 0 time(s) and did not give out money 0 time(s).

Do you want to give money to this person? ☐ YES  
☐ NO

OK

Round

7 out of 12

In the last round, you were the DONOR. You did give money.

Your record: In the last 5 round(s) as the DONOR, you gave money 3 time(s) and 2 time(s) you did not give money.

Right now, you have £ 2.50 .

In this round, you are the DONOR.

You have been randomly paired with someone else in this room. That other person is the RECEIVER in this round.

The other person's record: In the last 4 time(s) as a DONOR, this person gave out money 4 time(s) and did not give out money 0 time(s).

Do you want to give money to this person? ☐ YES  
☐ NO

OK

Round

7 out of 12

In the last round, you were the DONOR. You chose to give money.

Your record: In the past 4 round(s) as a DONOR, you have given out money  
4 time(s) and 0 time(s) you did not give out money.

Right now, you have £4.00.

In this round, you are the RECEIVER. You do not need to make a decision. Please wait.

continue

Round

8 out of 12

In the last round you were the RECEIVER. You did receive money.

Your record: In the last 4 round(s) as the DONOR, you gave money 4 time(s) and 0 time(s) you did not give money.

Right now, you have £ 6.00 .

In this round, you are the DONOR.

You have been randomly paired with someone else in this room. That other person is the RECEIVER in this round.

The other person's record: In the last 5 time(s) as a DONOR, this person gave out money 3 time(s) and did not give out money 2 time(s).

Do you want to give money to this person? ☐ YES  
☐ NO

OK

Round

9 out of 12

In the last period you were the RECEIVER. You did receive money.

Your record: In the past 5 round(s) as a DONOR, you have given out money  
3 time(s) and 2 time(s) you did not give out money.

Right now, you have £4.00.

In this round, you are the RECEIVER. You do not need to make a decision. Please wait.

continue

Round

11 out of 12

In the last round, you were the DONOR. You did not give money.

Your record: In the last 5 round(s) as the DONOR, you gave money 2 time(s) and 3 time(s) you did not give money.

Right now, you have £ 10.50 .

In this round, you are the DONOR.

You have been randomly paired with someone else in this room. That other person is the RECEIVER in this round.

The other person's record: In the last 5 time(s) as a DONOR, this person gave out money 3 time(s) and did not give out money 2 time(s).

Do you want to give money to this person? ☐ YES  
☐ NO

OK

Round

12 out of 12

Remaining time [sec]: 27

Thank you for playing the game.

Your final total is £8.00.



Thank you for participating in today's experiment! We would just like to ask you a few questions.

What number is your computer?

What is your gender?

- ☐ Male  
☐ Female

How old are you?

Thank you for participating!
